# Supplementary material for: Shrimp Lipid Droplet Protein Perilipin Involves in the Pathogenesis of AHPND-Causing Vibrio parahaemolyticus
Source: MDPI journal article supplement (doi:10.3390/ijms231810520), 2022-09-10
Supplement: s1 [file s1]

Table S1 Primers used in this study

| Primer name                     | Sequence (5'-3')                                                    |
|---------------------------------|---------------------------------------------------------------------|
| <b>For plasmid construction</b> |                                                                     |
| Myc- <i>Lv</i> Perilipin-F      | CGCGGATCCCGAGCAGAACTCATCTCTGAAGAGGATCTGATGG<br>CCCCCAAGCACCCCCACCTG |
| Myc- <i>Lv</i> Perilipin-R      | CCCAAGCTTCTAATCTTTTGTCTCCTCCTGATC                                   |
| <b>For qRT-PCR assay</b>        |                                                                     |
| qRT- <i>Lv</i> Perilipin-F      | CCTTCATCTTCGCCTCACA                                                 |
| qRT- <i>Lv</i> Perilipin-R      | CACGCCCAGTTATCCACA                                                  |
| qRT-PirB-F                      | ACCAACAGCAGGTGAATA                                                  |
| qRT-PirB-R                      | GTGGGCTGATAACGACTC                                                  |
| qRT- <i>Lv</i> EF1 $\alpha$ -F  | TATGCTCCTTTTGGACGTTTGC                                              |
| qRT- <i>Lv</i> EF1 $\alpha$ -R  | CCTTTTCTGCGGCCTTGGTAG                                               |
| <b>For RNAi assay</b>           |                                                                     |
| dsRNA- <i>Lv</i> Perilipin-F    | GGGAGGCTGTGGATAACTG                                                 |
| dsRNA- <i>Lv</i> Perilipin-R    | ATGGGCAGGGAAGCGACT                                                  |
| dsRNA- <i>Lv</i> Perilipin-T7-F | GGATCCTAATACGACTCACTATAGGGGGAGGCTGTGGATAACTG                        |
| dsRNA- <i>Lv</i> Perilipin-T7-R | GGATCCTAATACGACTCACTATAGGATGGGCAGGGAAGCGACT                         |
| dsRNA-EGFP-F                    | CGTAAACGGCCACAAGTT                                                  |
| dsRNA-EGFP-R                    | TTCACCTTGATGCCGTTT                                                  |
| dsRNA-EGFP-T7-F                 | GGATCCTAATACGACTCACTATAGGCGTAAACGGCCACAAGTT                         |
| dsRNA-EGFP-T7-R                 | GGATCCTAATACGACTCACTATAGGTTTACCTTGATGCCGTTT                         |
